# Supplementary material
Source: Springer Nature journal article supplement (https://www.springerprofessional.de/resource/supplementary/40095_2012_52_MOESM7_ESM.pdf/11899726)

### Time Vs Temp.

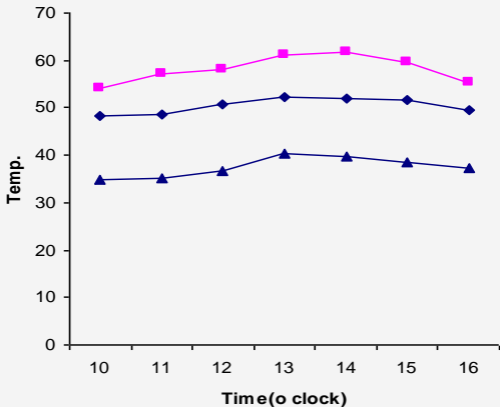

◆ Smooth Plate    ■ Rough Plate    ▲ Natural drying

Supplement: MOESM7 [file 11899726]
